# Supplementary material for: Sorting Through the Safety Data Haystack: Using Machine Learning to Identify Individual Case Safety Reports in Social-Digital Media
Source: PubMed Central journal article supplement — Drug Saf. 2018 Feb 14;41(6):579–90. doi: 10.1007/s40264-018-0641-7 (PMC5966485; doi:10.1007/s40264-018-0641-7), 2018-02-14
Supplement: 40264_2018_641_MOESM1_ESM.pdf [file 40264_2018_641_MOESM1_ESM.pdf]

## Sorting through the Safety Data Haystack: Using Machine Learning to Identify Individual Case Safety Reports (ICSRs) in Social-Digital Media

### Drug Safety

Shaun Comfort, Sujan Perera, Zoe Hudson, Darren Dorrell, Shawman Meireis, Meenakshi Nagarajan, Cartic Ramakrishnan and Jennifer Fine

Corresponding Author:  
Shaun Comfort, MD  
Genentech - A Member of the Roche Group  
South San Francisco, CA 94080  
[comforts@gene.com](mailto:comforts@gene.com)

**Electronic Supplementary Material 1** Table of keywords used in search for social digital media posts containing potential ICSRs.

| Roche Brands            | Roche Products                            | Medical and Biological terms |
|-------------------------|-------------------------------------------|------------------------------|
| 454 Life Sciences       | Accu-Chek;;;;;454 Sequencing<br>GS junior | 454 Sequencing GS junior;;   |
| Ariosa                  | Accutane;;;;;accucheck                    | Ärzte ohne grenzen;;         |
| Ariosa Diagnostics      | Roaccutan*;;;;;Accu-Chek                  | ABP 215                      |
| Bina Technologies       | Accutrend;;;;;Accutane                    | ABP 215;;                    |
| Biolmagine              | ACE910;;;;;                               | ABP 980                      |
| Capp Medical            | Actemra;;;;;Accutrend                     | ABP 980;;                    |
| Chugai                  | Activase;;;;;Accutrend                    | ABP798                       |
| Foundation Medicine     | Actonel;;;;;Acid phosphatase              | ABP798;;                     |
| Genentech               | Alecensa;;;;;Actemra                      | abstossungsreaktion*         |
| Geneweave               | Alelitazar;;;;;ACTH                       | abstossungsreaktion*;;       |
| Glycart                 | AmpliChip;;;;;Activase                    | access to medicine           |
| InterMune               | AmpliCor;;;;;Actonel                      | access to medicine;;         |
| Kapa Biosystems         | anaprox;;;;;AFB III                       | access to medicines          |
| NimbleGen               | anti-HCV Immunoassay;;;;;AFP              | access to medicines;;        |
| Ventana                 | Atezolizumab;;;;;Alcian Blue              | accucheck;;                  |
| Roche                   | Avastin;;;;;Alcian Yellow                 | Accutrend;;                  |
| Roche Group             | Bactrim;;;;;Alecensa                      | acne                         |
| F. Hoffmann-La Roche AG | Bloodhound;;;;;Alecensis                  | acne;;                       |
| Roche Holding AG        | Bondronat;;;;;Alectinib                   | adh                          |
| F. Hoffmann-La Roche AG | Bonviva;;;;;Alelitazar                    | adiposita*                   |
| NOT: Tony Roche         | Carvedilol;;;;;Alelitazar                 | adiposita*;;                 |
| NOT: Daniel Roche       | CellCept;;;;;ALK                          | Adipositas                   |
| NOT Tony Roche          | Cellcounting;;;;;Alkaline<br>Phosphatase  | Adipositas;;                 |

| Roche Brands                 | Roche Products                         | Medical and Biological terms        |
|------------------------------|----------------------------------------|-------------------------------------|
| NOT Brian Roche              | CETP inhibitor (R1658);;;;ALT/GPT      | adrenalin insufficiencies           |
| NOT Mr. Roche                | CINtec;;;;Ammonia                      | advanced renal failure              |
| NOT roche posay              | CoaguChek;;;;Amphetamines              | aids prevention                     |
| NOT roche brothers           | Coasys;;;;AmpliChip                    | aids prevention;;                   |
| NOT daniel roche             | Cobas;;;;AmpliChip                     | aids project                        |
| NOT Roche Football           | cobimetinib;;;;AmpliCor                | aids project;;                      |
| NOT La Roche Vendée Football | Combur-Test;;;;AmpliCor                | aids projects                       |
| NOT La Roche VF              | Copegus;;;;Amylase                     | aids projects;;                     |
| NOT Stephanie Roche          | Cotellic;;;;anaprox                    | aids projekt                        |
| NOT Cullen Roche             | Crenezumab;;;;Anti Muellierian Hormone | aids projekt;;                      |
| NOT Charlotte Roche          | Cymevene;;;;Anti-CCP                   | aids projekte                       |
| NOT la roche team            | Dalcetrapib;;;;Anti-HAV                | aids projekte;;                     |
| NOT Dan Roche                | Danoprevir;;;;Anti-HBc                 | AIDS-Test                           |
| NOT Daniel Roche             | Dormicum;;;;Anti-HBe                   | AIDS-Test;;                         |
| NOT Casy Roche               | Dual ISH test;;;;Anti-HBs              | airway obstruction                  |
| NOT Travis Roche             | Elecsys;;;;Anti-HCV                    | Akne                                |
| NOT Christof Roche           | emicizumab;;;;                         | akne*                               |
| NOT Nicolas Roche            | emtansine;;;;anti-HCV Immunoassay      | akne*;;                             |
| NOT Thorsten Roche           | Epogin;;;;anti-HCV Immunoassay         | Akne;;                              |
| NOT Otto Roche               | Erivedge;;;;Anti-Tg                    | Alecensis;;                         |
| NOT Liza Roche               | Esbriet;;;;Anti-TPO                    | Alectinib;;                         |
| NOT Marc Roche               | Euglucon;;;;Anti-TSH-R                 | Aleglitazar;;                       |
| NOT Donald Roche             | Fortovase;;;;Apolipoprotein A1         | Alzheimer                           |
| NOT Brandon Roche            | Fuzeon;;;;Apolipoprotein B             | Alzheimer*                          |
| NOT Erick Roche              | Ganciclovir;;;;ASLO                    | alzheimer*;;                        |
| NOT Dick Roche               | Gantenerumab;;;;AST/GOT                | Alzheimer;;                         |
| NOT Ella Roche               | Gazyva;;;;AT III                       | amerikanische arzneimittelbehörde   |
| NOT Henri-Pierre Roche       | Obinutuzumab;;;;Atezolizumab           | amerikanische arzneimittelbehörde;; |
| NOT Schriftsteller Roche     | Gazyvaro;;;;Avastin                    | amerikanische gesundheitsbehörde    |
| NOT Schriftstellerin Roche   | GDC-0425;;;;Bactrim                    | amerikanische gesundheitsbehörde;;  |
| Swisslab                     | GDC-0449;;;;Barbiturates               | AmpliChip;;                         |
| Systemex                     | GS FLX;;;;Basel cell cocktail          | AmpliCor;;                          |
|                              | Herceptin;;;;bcl-2                     | Anaemia                             |
|                              | Invirase;;;;Bicarbonate (CO2)          | Anaemia;;                           |
|                              | iScan;;;;Bilirubin                     | anemia                              |

| Roche Brands | Roche Products                       | Medical and Biological terms    |
|--------------|--------------------------------------|---------------------------------|
|              | Kadcyla;;;;;blood screening          | anti-ABeta-MAb                  |
|              | Klonopin;;;;;Bloodhound              | anti-ABeta-MAb;;                |
|              | Kytril;;;;;Bloodhound                | antibioti*                      |
|              | Lariam;;;;;Bondronat                 | antibioti*;;                    |
|              | Lebrikizumab;;;;;Bonviva             | antibiotic                      |
|              | Lexotanil;;;;;BRAF                   | antibiotic;;                    |
|              | Liat;;;;;C3c                         | Antibiotik*                     |
|              | LightCycler;;;;;CA                   | Antibiotik*;;                   |
|              | Lucentis;;;;;Ca2+                    | Antibody detection              |
|              | Mabthera;;;;;Calcitonin              | Anticoagulation self monitoring |
|              | Madopar;;;;;Calcium                  | anti-HCV Immunoassay;;          |
|              | Metmab;;;;;Cannabinoids              | antikörp*                       |
|              | Mircera;;;;;CARDIACreader            | antikörp*;;                     |
|              | MPDL3280A;;;;;Carvedilol             | antiretroviral                  |
|              | MPD-L3280;;;;;CD30                   | antiretroviral;;                |
|              | Multiplate;;;;;CEA                   | anxiety                         |
|              | Neorecormon;;;;;CellCept             | Applied Science                 |
|              | Neupogen;;;;;Cellcounting            | Applied Science;;               |
|              | Neutrogen;;;;;Cellcounting           | arthritis                       |
|              | Nimblegen;;;;;Ceruloplasmin          | Ärzte ohne grenzen              |
|              | NT-proBNP;;;;;CETP inhibitor (R1658) | asphyxia                        |
|              | Nutropin;;;;;Chagas4                 | Assays                          |
|              | Ocrelizumab;;;;;Chloride             | asthma                          |
|              | Ocrevus;;;;;Cholinesterase Acetyl    | atezolizumab;;                  |
|              | Olesoxime;;;;;Cholinesterase Butyryl | atrial fibrillation             |
|              | Omalizumab;;;;;CINtec                | Atypical Ductal Hyperplasia     |
|              | Pathway;;;;;CINtec                   | Aufsichtsbehörde*               |
|              | Pegasys;;;;;CK                       | Aufsichtsbehörde*;;             |
|              | Perjeta;;;;;CK-MB                    | auslaufend* Patent*             |
|              | Pertuzumab;;;;;CMV                   | auslaufend* Patent*;;           |
|              | Posicor;;;;;CMV IgG                  | autism                          |
|              | Pulmozime;;;;;CoaguChek              | autism*                         |
|              | Raptiva;;;;;CoaguChek                | autism*;;                       |
|              | Reflotron;;;;;Coagu-Chek             | autoimmun*                      |
|              | Rituxan;;;;;Coasys                   | autoimmun*;;                    |
|              | Roactemra;;;;;Coasys                 | autoimmune disease*             |
|              | rocaltrol;;;;;Cobas                  | Autoimmunkrankheit*             |
|              | Rocephin;;;;;Cobas                   | Autoimmunkrankheit*;;           |
|              | roferon;;;;;Cobas HPV                | BACE inhibitor                  |

| Roche Brands | Roche Products                             | Medical and Biological terms    |
|--------------|--------------------------------------------|---------------------------------|
|              | Rohypnol;;;;;cobimetinib                   | BACE inhibitor;;                |
|              | Septifast;;;;;COHb                         | bakterielle Infektion*          |
|              | Symphony Test;;;;;Combur-Test              | bakterielle Infektion*;;        |
|              | T-5224;;;;;Combur-Test                     | basal cell carcinoma            |
|              | T-DM1;;;;;Congo Red                        | BCD-022                         |
|              | Tamiflu;;;;;Copegus                        | BCD-022;;                       |
|              | TaqScreen;;;;;Cortisol                     | betablocker                     |
|              | Tarceva;;;;;Cotellic                       | Betablocker*                    |
|              | Tasmar;;;;;C-Peptide                       | Betablocker*;;                  |
|              | Taspoglutide;;;;;Creatinine                | betablocker;;                   |
|              | Tecentriq;;;;;Crenezumab                   | BI 695500                       |
|              | TG4001;;;;;CRP                             | BI 695500;;                     |
|              | Tina-quant;;;;;CT NG                       | BI 695502                       |
|              | TNKase;;;;;CTNG                            | BI 695502;;                     |
|              | toradol;;;;;Cyfra 21-1                     | big pharma                      |
|              | Troptonin;;;;;Cymevene                     | big pharma;;                    |
|              | Urisys;;;;;Cystatin C                      | Biogeneric                      |
|              | Valcyte;;;;;Cytomegalovirus                | Biogeneric;;                    |
|              | Valganciclovir;;;;;Dalcetrapib             | Biogenerico                     |
|              | Valium;;;;;Danoprevir                      | Biogenerico;;                   |
|              | Vantage;;;;;D-Dimer                        | Biogenerika                     |
|              | venetoclax;;;;;DHEA-S                      | Biogenerika;;                   |
|              | vesanoid;;;;;Diastase                      | Biogenerikum                    |
|              | Viracept;;;;;Digitoxin                     | Biogenerikum;;                  |
|              | Xcelligence;;;;;Digoxin                    | biogénérique                    |
|              | Xeloda;;;;;Dormicum                        | biogénérique;;                  |
|              | Xenical;;;;;Dual ISH test                  | biol*                           |
|              | Xolair;;;;;Dual ISH test                   | biol*;;                         |
|              | Zelboraf;;;;;EGFR                          | biologic copy                   |
|              | Zenapax;;;;;Elastic staining kit           | biologic copy;;                 |
|              | Acid phosphatase;;;;;Elecsys               | biologisch* Arznei*             |
|              | ACTH;;;;;Elecsys                           | biologisch* Arznei*;;           |
|              | AFB III;;;;;emtansine                      | Biopharma*                      |
|              | AFP;;;;;Epogin                             | Biopharma*;;                    |
|              | Alcian Blue;;;;;ER                         | Biopharmazeutika                |
|              | Alcian Yellow;;;;;ERG                      | Biopharmazeutika;;              |
|              | ALK;;;;;Erivedge                           | Biopharmazeutikum               |
|              | Alkaline Phosphatase;;;;;Erythrocytes (Hb) | Biopharmazeutikum;;             |
|              | ALT/GPT;;;;;Esbriet                        | Biopharmazeutische Innovationen |

| Roche Brands | Roche Products                          | Medical and Biological terms      |
|--------------|-----------------------------------------|-----------------------------------|
|              | Ammonia;;;;;Estradiol                   | Biopharmazeutische Innovationen;; |
|              | Amphetamines;;;;;Ethanol                | biosimilaire                      |
|              | Amylase;;;;;Euglucon                    | biosimilaire;;                    |
|              | Anti Muellierian Hormone;;;;;Ferritin   | Biosimilar                        |
|              | Anti-CCP;;;;;Folate                     | Biosimilar;;                      |
|              | Anti-HAV;;;;;Fortovase                  | Biotech*                          |
|              | Anti-HBc;;;;;Fructosamine               | Biotech*;;                        |
|              | Anti-HBe;;;;;FSH                        | Bioterapeutico                    |
|              | Anti-HBs;;;;;FT3                        | Bioterapeutico;;                  |
|              | Anti-HCV;;;;;FT4                        | Biotherapeutic                    |
|              | Anti-Tg;;;;;Fuzeon                      | biotherapeutic copy               |
|              | Anti-TPO;;;;;Gamma Glutamyl Transferase | biotherapeutic copy;;             |
|              | Anti-TSH-R;;;;;Ganciclovir              | Biotherapeutic;;                  |
|              | Apolipoprotein A1;;;;;Gantenerumab      | Biotherapeutika                   |
|              | Apolipoprotein B;;;;;Gazyva             | Biotherapeutika;;                 |
|              | ASLO;;;;;Gazyvaro                       | Biotherapeutikum                  |
|              | AST/GOT;;;;;GDC-0425                    | Biotherapeutikum;;                |
|              | AT III;;;;;GDC-0425                     | bladder cancer                    |
|              | Barbiturates;;;;;GDC-0449               | blockage of endotracheal tube     |
|              | Basel cell cocktail;;;;;GDC-0449        | Blood Gas and Electrolytes        |
|              | bcl-2;;;;;GGT                           | Blood glucose monitoring          |
|              | Bicarbonate (CO2);;;;;Giemsa            | blood loss                        |
|              | Bilirubin;;;;;Glutamate Dehydrogenase   | Blood sampling                    |
|              | blood screening;;;;;GMS III             | Blood sampling;;                  |
|              | BRAF;;;;;GOT (AST)                      | blood screening                   |
|              | C-Peptide;;;;;GPT (ALT)                 | blood screening;;                 |
|              | C3c;;;;;Gram staining kit               | blood transfusion                 |
|              | CA;;;;;GS FLX                           | Blood-Bank                        |
|              | Ca2+;;;;;GS FLX                         | Blood-Bank;;                      |
|              | Calcitonin;;;;;H&E                      | Bloodhound;;                      |
|              | Calcium;;;;;Haptoglobin                 | Blue genes                        |
|              | Cannabinoids;;;;;Harmony test           | Blue genes;;                      |
|              | CD30;;;;;HbA1c                          | Blutbank                          |
|              | CEA;;;;;HBeAg                           | Blutbank;;                        |
|              | Ceruloplasmin;;;;;HBsAG                 | Blutgerinnungsmessgeraet          |
|              | Chagas4;;;;;HBV                         | Blutgerinnungsmessgeraet;;        |
|              | Chloride;;;;;hCG                        | Blutgewinnung                     |
|              | Cholinesterase Acetyl;;;;;HCV           | Blutgewinnung;;                   |

| Roche Brands | Roche Products                                          | Medical and Biological terms |
|--------------|---------------------------------------------------------|------------------------------|
|              | Cholinesterase Butyryl;;;;;HDL                          | Blutglukose                  |
|              | CK;;;;;HE4                                              | Blutglukose;;                |
|              | CK-MB;;;;;Hematocrit                                    | Blutscreening                |
|              | CMV;;;;;Hemoglobin total                                | Blutscreening;;              |
|              | CMV IgG;;;;;HER-2                                       | Bluttest                     |
|              | COHb;;;;;Herceptin                                      | Bluttest;;                   |
|              | Congo Red;;;;;hGH                                       | Blutzucker                   |
|              | Cortisol;;;;;HHb                                        | Blutzucker MessgerÄxt;;      |
|              | Creatinine;;;;;HIV                                      | Blutzucker MessgerÄt         |
|              | CRP;;;;;Homocysteine                                    | Blutzucker;;                 |
|              | CT NG;;;;;HPV                                           | bone                         |
|              | CTNG;;;;;HSV-1 IgG                                      | bonemarkers                  |
|              | Cyfra 21-1;;;;;HSV-2 IgG                                | brain trauma                 |
|              | Cystatin<br>C;;;;;HTLV.(II IV I 1 2 4)                  | breast cancer                |
|              | Cytomegalovirus;;;;;Human<br>papiloma virus             | bronchitis                   |
|              | D-<br>Dimer;;;;;Humanpapilomavirus                      | BSE                          |
|              | DHEA-S;;;;;Hydroxybutyrat<br>Dehydrogenase              | BSE;;                        |
|              | Diastase;;;;;Î±1-Acid<br>Glycoprotein                   | Bundesamt für Gesundheit     |
|              | Digitoxin;;;;;Î±1-Antitrypsin                           | Bundesamt für Gesundheit;;   |
|              | Digoxin;;;;;Î² 2-Microglobulin                          | cancer diagnostics           |
|              | EGFR;;;;;Î²-CrossLaps                                   | cancer diagnostics;;         |
|              | Elastic staining kit;;;;;IgA                            | cancer immunotherap*         |
|              | ER;;;;;IgE                                              | carbon monoxide poisoning    |
|              | ERG;;;;;IgG                                             | Cardiac                      |
|              | Erythrocytes (Hb);;;;;IgM                               | CARDIAC reader;;             |
|              | Estradiol;;;;;Immunglobulin                             | Cardiac testing              |
|              | Ethanol;;;;;Interleukin 6                               | Cardiac-reader               |
|              | Ferritin;;;;;Invirase                                   | Cardiac-reader;;             |
|              | Folate;;;;;Iron Binding Capacity -<br>Unsaturated       | Cellcounting;;               |
|              | Fructosamine;;;;;iScan                                  | Cell-free DNA                |
|              | FSH;;;;;Jones                                           | central nervous system       |
|              | FT3;;;;;K+                                              | central nervous system;;     |
|              | FT4;;;;;Kadcyla                                         | cervical cancer              |
|              | Gamma Glutamyl<br>Transferase;;;;;Kappa light<br>chains | cfDNA                        |
|              | GGT;;;;;Ketone                                          | checkpoint inhibitor         |

| Roche Brands | Roche Products                              | Medical and Biological terms             |
|--------------|---------------------------------------------|------------------------------------------|
|              | Giemsa;;;;;Ki-67                            | chelators                                |
|              | Glutamate Dehydrogenase;;;;;Klonopin        | Chemotherapie                            |
|              | GMS III;;;;;KRAS                            | Chemotherapie;;                          |
|              | GOT (AST);;;;;Kytril                        | chronic cardiac failure                  |
|              | GPT (ALT);;;;;Lactate                       | chronic hypernatremia                    |
|              | Gram staining kit;;;;;Lactate Dehydrogenase | Chronic progressing alveolar destruction |
|              | H&E;;;;;Lambda light chains                 | Chronic renal failure                    |
|              | Haptoglobin;;;;;Lariam                      | CINtec;;                                 |
|              | Harmony test;;;;;LDL                        | Circle of care                           |
|              | HbA1c;;;;;Lebrikizumab                      | Circle of care;;                         |
|              | HBeAg;;;;;Leukocytes                        | Circulatory failure                      |
|              | HBsAG;;;;;Lexotanil                         | CLIA lab                                 |
|              | HBV;;;;;LH                                  | CLIA waiver                              |
|              | hCG;;;;;Liat                                | Clinical Chemistry                       |
|              | HCV;;;;;LightCycler                         | clinical trial*                          |
|              | HDL;;;;;LightCycler                         | clinical trial*;;                        |
|              | HE4;;;;;Lipase                              | CNS                                      |
|              | Hematocrit;;;;;Lipids                       | CNS;;                                    |
|              | Hemoglobin total;;;;;Lipoprotein (a)        | COAD                                     |
|              | HER-2;;;;;LSD                               | CoaguChek;;                              |
|              | hGH;;;;;Lucentis                            | Coagu-Chek;;                             |
|              | HHb;;;;;Mabthera                            | Coagulation                              |
|              | HIV;;;;;Madopar                             | Coagulation monitoring                   |
|              | Homocysteine;;;;;Magnesium                  | Coasys;;                                 |
|              | HPV;;;;;Methadone                           | Cobas HPV;;                              |
|              | HSV-1 IgG;;;;;Methaqualone                  | Cobas;;                                  |
|              | HSV-2 IgG;;;;;MetHb                         | cognitive disorders                      |
|              | HTLV.(II IV I 1 2 4);;;;;Metmab             | cognitive disorders;;                    |
|              | Human papiloma virus;;;;;Mircera            | colitis                                  |
|              | Humanpapilomavirus;;;;;MPD-L3280            | Colorectal cancer                        |
|              | Hydroxybutyrate Dehydrogenase;;;;;MPDL3280A | Combur-Test;;                            |
|              | IgA;;;;;Mucicarmine                         | conference                               |
|              | IgE;;;;;Multiplate                          | conference;;                             |
|              | IgG;;;;;Multiplex                           | Congenital Heart defect                  |
|              | IgM;;;;;Myoglobin                           | Congestive heart failure                 |
|              | Immunglobulin;;;;;Na+                       | Congress                                 |
|              | Interleukin 6;;;;;Neorecormon               | Congress;;                               |

| Roche Brands | Roche Products                                   | Medical and Biological terms       |
|--------------|--------------------------------------------------|------------------------------------|
|              | Iron Binding Capacity - Unsaturated;;;;;Neupogen | continuous monitoring              |
|              | Jones;;;;;Neutrogin                              | continuous monitoring;;            |
|              | K+;;;;;Nimblegen                                 | COPD                               |
|              | Kappa light chains;;;;;Nitrite                   | copia de producto biologico;;      |
|              | Ketone;;;;;N-MID Osteocalcin                     | copia de producto bioterapeutico   |
|              | Ki-67;;;;;NSE                                    | copia de producto bioterapeutico;; |
|              | KRAS;;;;;NT-proBNP                               | copie de médicament biologique;;   |
|              | Lactate;;;;;NT-proBNP                            | copie de médicament biologique     |
|              | Lactate Dehydrogenase;;;;;NT-proBNP              | copie de produit biologique        |
|              | Lambda light chains;;;;;Nutropin                 | copie de produit biologique;;      |
|              | LDL;;;;;O2Hb                                     | Corticosteroid excess              |
|              | Leukocytes;;;;;Obinutuzumab                      | Crenezumab;;                       |
|              | LH;;;;;Ocrelizumab                               | crispr                             |
|              | Lipase;;;;;Ocrevus                               | critical care                      |
|              | Lipids;;;;;Olesoxime                             | Crohn's disease                    |
|              | Lipoprotein (a);;;;;Omalizumab                   | CT-P10                             |
|              | LSD;;;;;Opiates                                  | CT-P10;;                           |
|              | Magnesium;;;;;Oxycodone                          | CT-P6                              |
|              | Methadone;;;;;Oxygen Saturation                  | CT-P6;;                            |
|              | Methaqualone;;;;;p16                             | Cytotoxic agent administration     |
|              | MetHb;;;;;p18                                    | DAT                                |
|              | Mucicarmine;;;;;P1NP                             | Decreased blood volume             |
|              | Multiplex;;;;;PAP smear                          | Depression                         |
|              | Myoglobin;;;;;parvovirus                         | depression*                        |
|              | N-MID Osteocalcin;;;;;PAS                        | depression*;;                      |
|              | Na+;;;;;Pathway                                  | Depression;;                       |
|              | Nitrite;;;;;PCO2                                 | dermatitis                         |
|              | NSE;;;;;Pegasys                                  | dermatolo*                         |
|              | NT-proBNP;;;;;Perjeta                            | dermatolo*;;                       |
|              | O2Hb;;;;;Pertuzumab                              | Dermatologie                       |
|              | Opiates;;;;;pH                                   | Dermatologie;;                     |
|              | Oxycodone;;;;;Phencyclidine                      | Dermatology                        |
|              | Oxygen Saturation;;;;;Phosphorus                 | Dermatology;;                      |
|              | p16;;;;;PO2                                      | Dermatopathology                   |
|              | p18;;;;;Posicor                                  | diabet*                            |
|              | P1NP;;;;;Potassium                               | diabet*;;                          |



| <b>Roche Brands</b> | <b>Roche Products</b>                        | <b>Medical and Biological terms</b> |
|---------------------|----------------------------------------------|-------------------------------------|
|                     | PAP smear;;;;;PR                             | Diabetes                            |
|                     | parvovirus;;;;;Prealbumin                    | Diabetes mellitus                   |
|                     | PAS;;;;;Procalcitonin                        | Diabetes;;                          |
|                     | PCO2;;;;;Progesterone                        | Diagnos*                            |
|                     | pH;;;;;proGRP                                | Diagnose                            |
|                     | Phencyclidine;;;;;Prolactin                  | Diagnose;;                          |
|                     | Phosphorus;;;;;Propoxyphene                  | Diagnosis                           |
|                     | PO2;;;;;PSA free                             | diagnosis of pleural effusion       |
|                     | Potassium;;;;;PSA total                      | Diagnosis;;                         |
|                     | PR;;;;;PT/Quick                              | Diagnostic                          |
|                     | Prealbumin;;;;;PTH                           | Diagnostic;;                        |
|                     | Procalcitonin;;;;;Pulmozime                  | DIAGNOSTICS                         |
|                     | Progesterone;;;;;Raptiva                     | Diagnostics;;                       |
|                     | proGRP;;;;;Reflotron                         | Diagnostik                          |
|                     | Prolactin;;;;;Reflotron                      | Diagnostik;;                        |
|                     | Propoxyphene;;;;;Reticulum II                | Diagnostika                         |
|                     | PSA free;;;;;Rheumatoid factor               | Diagnostika;;                       |
|                     | PSA total;;;;;Rituxan                        | Digital pathology                   |
|                     | PT/Quick;;;;;Roaccutan*                      | DISH                                |
|                     | PTH;;;;;Roactemra                            | Diuretic Issues                     |
|                     | Reticulum II;;;;;rocaltrol                   | DNA                                 |
|                     | Rheumatoid factor;;;;;Rocephin               | Dna Analyse                         |
|                     | Rubella;;;;;roferon                          | Dna Analyse;;                       |
|                     | S-100;;;;;Rohypnol                           | dna Chip                            |
|                     | SCC4;;;;;Rubella                             | dna Chip;;                          |
|                     | sFlt-1/PIGF;;;;;S-100                        | Dna Technologie                     |
|                     | SHBG;;;;;SCC4                                | Dna Technologie;;                   |
|                     | SO2 COOX;;;;;Septifast                       | DNA;;                               |
|                     | Sodium;;;;;Septifast                         | Down Syndrome                       |
|                     | Soluble transferrin receptor;;;;;sFlt-1/PIGF | down syndrome;;                     |
|                     | Specific gravity;;;;;SHBG                    | Downs Syndrom                       |
|                     | Steiner;;;;;SO2 COOX                         | dritte welt                         |
|                     | Steiner II;;;;;Sodium                        | dritte welt;;                       |
|                     | T-uptake;;;;;Soluble transferrin receptor    | Drug alterations                    |
|                     | T3;;;;;Specific gravity                      | Drug alterations - salicylate       |
|                     | T4;;;;;Steiner                               | drug approval                       |
|                     | Testosterone;;;;;Steiner II                  | drug approval;;                     |
|                     | tHb-COOX;;;;;Swisslab                        | drug benefit                        |
|                     | Thyreoglobulin;;;;;Symphony Test             | drug benefit;;                      |

| Roche Brands | Roche Products                             | Medical and Biological terms |
|--------------|--------------------------------------------|------------------------------|
|              | Total Protein;;;;;Sysmex                   | drug benefits                |
|              | Toxo;;;;;T3                                | drug benefits;;              |
|              | Toxoplasmosis;;;;;T4                       | drug discovery               |
|              | TPLA (Syphilis);;;;;T-5224                 | drug discovery;;             |
|              | Transferrin;;;;;Tamiflu                    | drug pipeline                |
|              | Trichrome;;;;;TaqScreen                    | drug pipeline;;              |
|              | Triglycerides;;;;;TaqScreen                | drug target*                 |
|              | Triglycerides Glycerol blanked;;;;;Tarceva | drug target*;;               |
|              | Troponin I;;;;;Tasmar                      | drugs                        |
|              | Troponin T;;;;;Taspoglutide                | drugs compan*                |
|              | TSH;;;;;T-DM1                              | drugs compan*;;              |
|              | TTF 1;;;;;Tecentriq                        | drugs industry               |
|              | Urea (BUN);;;;;Testosterone                | drugs industry;;             |
|              | Uric Acide;;;;;TG4001                      | drugs;;                      |
|              | Urobilinogen;;;;;tHb-COOX                  | Dual ISH test;;              |
|              | varicella-zoster;;;;;Thyreoglobulin        | Dyslipidemia                 |
|              | Viral load;;;;;Tina-quant                  | Einlizenzierung*             |
|              | Vitamin B12;;;;;Tina-quant                 | Einlizenzierung*;;           |
|              | Vitamin D;;;;;TNKase                       | eiweiss*                     |
|              | Vitamin D total;;;;;toradol                | eiweiss*;;                   |
|              | Î±1-Acid Glycoprotein;;;;;Total Protein    | Elecsys;;                    |
|              | Î±1-Antitrypsin;;;;;Toxo                   | Emboli                       |
|              | Î²2-Microglobulin;;;;;Toxoplasmosis        | EMEA                         |
|              | Î²2-CrossLaps;;;;;TPLA (Syphilis)          | EMEA;;                       |
|              | LightCycler;;;;;Transferrin                | emergency room               |
|              | Cellcounting;;;;;Trichrome                 | Emphysema                    |
|              | 454 Sequencing GS junior;;;;;Triglycerides | Endocrinology                |
|              | GS FLX;;;;;Triglycerides Glycerol blanked  | Endocrine disorders          |
|              | anti-HCV Immunoassay;;;;;Troponin I        | english keywords"Healthcare  |
|              | accucheq;;;;;Troponin T                    | Entwicklungsländ*            |
|              | Dual ISH test;;;;;Troptonin                | Entwicklungsländ*;;          |
|              | GDC-0425;;;;;Troptonin                     | entzündung*                  |
|              | GDC-0449;;;;;TSH                           | entzündung*;;                |
|              | Aleglitazar;;;;;TTF 1                      | epidem*                      |
|              | Accutrend;;;;;T-uptake                     | epidem*;;                    |

| Roche Brands | Roche Products                                 | Medical and Biological terms      |
|--------------|------------------------------------------------|-----------------------------------|
|              | AmpliChip;;;;;Urea (BUN)                       | Europäische Arzneimittelagentur   |
|              | AmpliCor;;;;;Uric Acide                        | Europäische Arzneimittelagentur   |
|              | CoaguChek;;;;;Urisys                           | Europäische Arzneimittelagentur;; |
|              | Coasys;;;;;Urisys                              | Europäische Arzneimittelagentur;; |
|              | Cobas;;;;;Urobilinogen                         | European Medicines Agency         |
|              | Cobas HPV;;;;;Valcyte                          | European Medicines Agency;;       |
|              | Combur-Test;;;;;Valganciclovir                 | Excess HCO3 administration        |
|              | Elecsys;;;;;Valium                             | Excessive insulin                 |
|              | NT-proBNP;;;;;Vantage                          | expiring patent*                  |
|              | Septifast;;;;;varicella-zoster                 | expiring patent*;;                |
|              | TaqScreen;;;;;venetoclax                       | F&E                               |
|              | Troptonin;;;;;vesanoid                         | F&E;;                             |
|              | CARDIAC reader;;;;;Viracept                    | FDA                               |
|              | Bloodhound;;;;;Viral load                      | FDA Approval                      |
|              | CINtec;;;;;Vitamin B12                         | FDA;;                             |
|              | Coagu-Chek;;;;;Vitamin D                       | Fertility                         |
|              | Reflotron;;;;;Vitamin D total                  | fettleibig*                       |
|              | Swisslab;;;;;Xcelligence                       | fettleibig*;;                     |
|              | Systemex;;;;;Xeloda                            | fettleibigkeit                    |
|              | Tina-quant;;;;;Xenical                         | fettleibigkeit;;                  |
|              | Urisys;;;;;Xolair                              | fibrosis                          |
|              | (Confirm Inform Modular Pathway Multiplate).{1 | filing for approval               |
|              | Alecensis;;;;;Zenapax                          | filing for approval;;             |
|              | Alectinib;;;;;                                 | FISH                              |
|              |                                                | flu                               |
|              |                                                | flu;;                             |
|              |                                                | Follow-on biologic                |
|              |                                                | Follow-on biologic;;              |
|              |                                                | forsch*                           |
|              |                                                | forsch*;;                         |
|              |                                                | Forschung & Entwicklung           |
|              |                                                | Forschung & Entwicklung;;         |
|              |                                                | Forschungsabteilung               |
|              |                                                | Forschungsabteilung;;             |
|              |                                                | Forschungsaufwendung*             |
|              |                                                | Forschungsaufwendung*;;           |
|              |                                                | Forschungslabor                   |
|              |                                                | Forschungslabor;;                 |

| Roche Brands | Roche Products | Medical and Biological terms   |
|--------------|----------------|--------------------------------|
|              |                | fragile-X                      |
|              |                | fragile-X;;                    |
|              |                | GABA-A                         |
|              |                | GABA-A;;                       |
|              |                | GABA-Alpha-5-inverse agonist   |
|              |                | GABA-Alpha-5-inverse agonist;; |
|              |                | GDC-0425;;                     |
|              |                | GDC-0449;;                     |
|              |                | gefässerk*                     |
|              |                | gefässerk*;;                   |
|              |                | Gefässerkrankung*              |
|              |                | Gefässerkrankung*;;            |
|              |                | gefässkrank*                   |
|              |                | gefässkrank*;;                 |
|              |                | genanaly*                      |
|              |                | genanaly*;;                    |
|              |                | Gene expressing research       |
|              |                | Gene expressing research;;     |
|              |                | generic cop*                   |
|              |                | generic cop*;;                 |
|              |                | generics                       |
|              |                | generics;;                     |
|              |                | Generika*                      |
|              |                | Generika*;;                    |
|              |                | Generikum*                     |
|              |                | Generikum*;;                   |
|              |                | genet*                         |
|              |                | genet*;;                       |
|              |                | genetic test                   |
|              |                | genetic test;;                 |
|              |                | genmaterial                    |
|              |                | genmaterial;;                  |
|              |                | Genome sequencer               |
|              |                | Genome sequencer;;             |
|              |                | Genomics                       |
|              |                | genomics;;                     |
|              |                | genotyping                     |
|              |                | Gentechnisch                   |
|              |                | Gentechnisch;;                 |
|              |                | Gentest                        |
|              |                | gentest*                       |
|              |                | gentest*;;                     |

| Roche Brands | Roche Products | Medical and Biological terms |
|--------------|----------------|------------------------------|
|              |                | Gentest;;                    |
|              |                | gentherap*                   |
|              |                | gentherap*;;                 |
|              |                | gesundheit*                  |
|              |                | gesundheit*;;                |
|              |                | Gesundheitsmarkt*            |
|              |                | Gesundheitsmarkt*;;          |
|              |                | Gesundheitswesen             |
|              |                | Gesundheitswesen;;           |
|              |                | GI absobtive issues          |
|              |                | glaucoma                     |
|              |                | glioblastoma                 |
|              |                | glucose meter                |
|              |                | glucose meter;;              |
|              |                | GP 2013                      |
|              |                | GP 2013;;                    |
|              |                | GP2013                       |
|              |                | GP-2013                      |
|              |                | GP2013;;                     |
|              |                | GP-2013;;                    |
|              |                | Grippe                       |
|              |                | Grippe;;                     |
|              |                | Grosslabor                   |
|              |                | Grosslabor;;                 |
|              |                | GS FLX;;                     |
|              |                | H1N1                         |
|              |                | H1N1;;                       |
|              |                | H5N1                         |
|              |                | H5N1;;                       |
|              |                | HBV                          |
|              |                | HBV;;                        |
|              |                | HCV                          |
|              |                | HCV;;                        |
|              |                | Health care                  |
|              |                | Health care;;                |
|              |                | HEALTHCARE                   |
|              |                | health-care                  |
|              |                | Healthcare keywords;;        |
|              |                | Healthcare;;                 |
|              |                | health-care;;                |
|              |                | Heart attack                 |
|              |                | Heart Failure                |

| Roche Brands | Roche Products | Medical and Biological terms              |
|--------------|----------------|-------------------------------------------|
|              |                | heilmittelgesetz                          |
|              |                | heilmittelgesetz;;                        |
|              |                | hematology                                |
|              |                | hematology analyzer                       |
|              |                | hematology analyzer;;                     |
|              |                | Hematopathology                           |
|              |                | Hemostasis                                |
|              |                | Hepatic Cirrhosis                         |
|              |                | Hepatitis                                 |
|              |                | Hepatitis C                               |
|              |                | Hepatitis C;;                             |
|              |                | Hepatitis;;                               |
|              |                | Hepatology                                |
|              |                | HER2 positive                             |
|              |                | Hercules                                  |
|              |                | Hercules;;                                |
|              |                | herzinsuffizien*                          |
|              |                | herzinsuffizien*;;                        |
|              |                | herzinsuffizienz                          |
|              |                | herzinsuffizienz;;                        |
|              |                | Herz-Kreislauf                            |
|              |                | herzkreislauf*                            |
|              |                | herzkreislauf*;;                          |
|              |                | Herz-Kreislauf;;                          |
|              |                | Histology                                 |
|              |                | HIV                                       |
|              |                | HIV;;                                     |
|              |                | HIV-Infektion                             |
|              |                | HIV-Infektion;;                           |
|              |                | hmg                                       |
|              |                | hmg;;                                     |
|              |                | hyperbiliruninemia                        |
|              |                | Hypermagnesemia                           |
|              |                | Hyperosmolality                           |
|              |                | Hyperparathyroidism                       |
|              |                | Hyperphosphatemia                         |
|              |                | Hyperventilation by mechanical ventilator |
|              |                | Hypodipsia                                |
|              |                | Hypomagnesemia                            |
|              |                | Hypoparathyroidism                        |

| Roche Brands | Roche Products | Medical and Biological terms                                       |
|--------------|----------------|--------------------------------------------------------------------|
|              |                | Hypoventilation by mechanical ventilator                           |
|              |                | Hypoxemia                                                          |
|              |                | Immonhистоchemistry                                                |
|              |                | immune oncology                                                    |
|              |                | immunoassays                                                       |
|              |                | immunoassays;;                                                     |
|              |                | Immunochemistry                                                    |
|              |                | immun-onkologie                                                    |
|              |                | immuno-oncology                                                    |
|              |                | immunotherap*                                                      |
|              |                | immunsuppressiv*                                                   |
|              |                | immunsuppressiv*;;                                                 |
|              |                | immuntherap*                                                       |
|              |                | Impaired fuction of respiratory center                             |
|              |                | In situ hybridization                                              |
|              |                | In vitro diagnostics                                               |
|              |                | Inadequate cardiac output                                          |
|              |                | indication                                                         |
|              |                | indication;;                                                       |
|              |                | indikation                                                         |
|              |                | indikation;;                                                       |
|              |                | Infectious Diseases                                                |
|              |                | Infektionskrankheit*                                               |
|              |                | Infektionskrankheit*;;                                             |
|              |                | Inflammation                                                       |
|              |                | inflammation*                                                      |
|              |                | inflammation*;;                                                    |
|              |                | influenza                                                          |
|              |                | infusion system                                                    |
|              |                | infusion system;;                                                  |
|              |                | Infusionssystem                                                    |
|              |                | Infusionssystem;;                                                  |
|              |                | In-licensing                                                       |
|              |                | In-licensing;;                                                     |
|              |                | Institut für Qualität und Wirtschaftlichkeit im Gesundheitswesen   |
|              |                | Institut für Qualität und Wirtschaftlichkeit im Gesundheitswesen;; |
|              |                | institut*                                                          |

| Roche Brands | Roche Products | Medical and Biological terms                          |
|--------------|----------------|-------------------------------------------------------|
|              |                | institut*;;                                           |
|              |                | institute                                             |
|              |                | Institute for Quality and Efficiency in Health Care   |
|              |                | Institute for Quality and Efficiency in Health Care;; |
|              |                | institute;;                                           |
|              |                | insulin                                               |
|              |                | Insulin deficiency                                    |
|              |                | insulin;;                                             |
|              |                | Insulinoma                                            |
|              |                | Insulinpumpe                                          |
|              |                | Insulinpumpe;;                                        |
|              |                | integrated health care                                |
|              |                | integrated health care;;                              |
|              |                | integrated healthcare                                 |
|              |                | integrated healthcare;;                               |
|              |                | integrierte Gesundheitslösung*                        |
|              |                | integrierte Gesundheitslösung*;;                      |
|              |                | Intended copy biologic                                |
|              |                | Intended copy biologic;;                              |
|              |                | intensive care                                        |
|              |                | internal bleeding                                     |
|              |                | Interpharma                                           |
|              |                | Interpharma;;                                         |
|              |                | In-vitro diagnostics                                  |
|              |                | In-vitro diagnostics;;                                |
|              |                | IQWiG                                                 |
|              |                | IQWiG;;                                               |
|              |                | ISH                                                   |
|              |                | isoniazid                                             |
|              |                | isoniazid;;                                           |
|              |                | IVD                                                   |
|              |                | kassenpflichtig*                                      |
|              |                | kassenpflichtig*;;                                    |
|              |                | Ketoacidosis                                          |
|              |                | Kidney (renal) function                               |
|              |                | kidney cancer                                         |
|              |                | klinisch*                                             |
|              |                | klinisch* Studi*                                      |
|              |                | klinisch* Studi*;;                                    |



| Roche Brands | Roche Products | Medical and Biological terms              |
|--------------|----------------|-------------------------------------------|
|              |                | klinisch* Test*                           |
|              |                | klinisch* Test*;;                         |
|              |                | klinisch* Versuch*                        |
|              |                | klinisch* Versuch*;;                      |
|              |                | klinisch*;;                               |
|              |                | Kombinationstherapie*                     |
|              |                | Kombinationstherapie*;;                   |
|              |                | kongress*                                 |
|              |                | kongress*;;                               |
|              |                | Konsumentenschutz                         |
|              |                | Konsumentenschutz;;                       |
|              |                | krankenkas*                               |
|              |                | krankenkas*;;                             |
|              |                | krankenvers*                              |
|              |                | krankenvers*;;                            |
|              |                | Krankheiten des zentralen Nervensystems   |
|              |                | Krankheiten des zentralen Nervensystems;; |
|              |                | Krankheitserkennung                       |
|              |                | Krankheitserkennung;;                     |
|              |                | krankheitversicherungsgesetz              |
|              |                | krankheitversicherungsgesetz;;            |
|              |                | Krebs                                     |
|              |                | Krebs;;                                   |
|              |                | Kreislaufinsuffizienz                     |
|              |                | Kreislaufinsuffizienz;;                   |
|              |                | kvg                                       |
|              |                | kvg;;                                     |
|              |                | labor*                                    |
|              |                | labor*;;                                  |
|              |                | Laboratory automation                     |
|              |                | laboratory diagnostics                    |
|              |                | laboratory diagnostics;;                  |
|              |                | Lactate acidosis                          |
|              |                | Lactate clearance                         |
|              |                | langzeittherapie*                         |
|              |                | langzeittherapie*;;                       |
|              |                | Lanzette                                  |
|              |                | Lanzette;;                                |
|              |                | Left ventricular failure                  |
|              |                | Leukämie                                  |

| Roche Brands | Roche Products | Medical and Biological terms            |
|--------------|----------------|-----------------------------------------|
|              |                | Leukämie;;                              |
|              |                | leukemia                                |
|              |                | lightcycler                             |
|              |                | LightCycler;;                           |
|              |                | linear array                            |
|              |                | Lipid testing                           |
|              |                | Liquid biopsy                           |
|              |                | Loss of bicarbonate                     |
|              |                | Loss of hypertonic fluids               |
|              |                | lung cancer                             |
|              |                | lupus                                   |
|              |                | MabionCD20                              |
|              |                | MabionCD20;;                            |
|              |                | macular degeneration                    |
|              |                | Malignancy                              |
|              |                | Managed laboratory services             |
|              |                | Managed services                        |
|              |                | MAO-B inhibitor                         |
|              |                | MAO-B inhibitor;;                       |
|              |                | Markenmedikament*                       |
|              |                | Markenmedikament*;;                     |
|              |                | marker                                  |
|              |                | marker;;                                |
|              |                | Markteinführung*                        |
|              |                | Markteinführung*;;                      |
|              |                | Massive hemolysis                       |
|              |                | Mechanical heart valve                  |
|              |                | medicaid                                |
|              |                | medicaid;;                              |
|              |                | medical                                 |
|              |                | medical;;                               |
|              |                | médicament biologique non comparable;;  |
|              |                | médicament biologique;;                 |
|              |                | médicament obtenus par biotechnologie;; |
|              |                | médicament biologique                   |
|              |                | médicament biologique non comparable    |
|              |                | médicament obtenus par biotechnologie   |
|              |                | medicare                                |
|              |                | medicare;;                              |

| Roche Brands | Roche Products | Medical and Biological terms                          |
|--------------|----------------|-------------------------------------------------------|
|              |                | medicine                                              |
|              |                | medicine*                                             |
|              |                | medicine*;;                                           |
|              |                | medicine;;                                            |
|              |                | Medicines and Healthcare products Regulatory Agency   |
|              |                | Medicines and Healthcare products Regulatory Agency;; |
|              |                | medicins sans frontieres;;                            |
|              |                | Medikament*                                           |
|              |                | Medikament*;;                                         |
|              |                | Medikamentenpreis*                                    |
|              |                | Medikamentenpreis*;;                                  |
|              |                | Medikamentenzulassung*                                |
|              |                | Medikamentenzulassung*;;                              |
|              |                | medizinische Formel                                   |
|              |                | medizinische Formel;;                                 |
|              |                | meilenstein                                           |
|              |                | Melanoma                                              |
|              |                | Metabolic                                             |
|              |                | Metabolic acidosis                                    |
|              |                | Metabolic Alkalosis                                   |
|              |                | Metabolic syndrome                                    |
|              |                | metabolism                                            |
|              |                | metabolism;;                                          |
|              |                | metasta*                                              |
|              |                | metasta*;;                                            |
|              |                | Metastase*                                            |
|              |                | Metastase*;;                                          |
|              |                | metastatic melanoma                                   |
|              |                | mGluR2 antagonist                                     |
|              |                | mGluR2 antagonist;;                                   |
|              |                | mGluR5 antagonist                                     |
|              |                | mGluR5 antagonist;;                                   |
|              |                | MHRA                                                  |
|              |                | MHRA;;                                                |
|              |                | microarrays                                           |
|              |                | microarrays;;                                         |
|              |                | Microbiology                                          |
|              |                | milenstein;;                                          |
|              |                | milestone                                             |
|              |                | milestone;;                                           |

| Roche Brands | Roche Products | Medical and Biological terms                        |
|--------------|----------------|-----------------------------------------------------|
|              |                | molecular diagnostics                               |
|              |                | molecular diagnostics;;                             |
|              |                | molecular entit*                                    |
|              |                | molecular entit*;;                                  |
|              |                | Molekulardiagnostik                                 |
|              |                | Molekulardiagnostik;;                               |
|              |                | Monitoring                                          |
|              |                | Monitoring device                                   |
|              |                | Monotherapie*                                       |
|              |                | Monotherapie*;;                                     |
|              |                | multiple myeloma                                    |
|              |                | multiple sclerosis                                  |
|              |                | multiple sclerosis;;                                |
|              |                | multiple sklerose                                   |
|              |                | multiple sklerose;;                                 |
|              |                | Myocardinal Infarction                              |
|              |                | Nachahmerprodukt*                                   |
|              |                | Nachahmerprodukt*;;                                 |
|              |                | Nachfolgeprodukt                                    |
|              |                | Nachfolgeprodukt;;                                  |
|              |                | Nachfolgerprodukt*                                  |
|              |                | Nachfolgerprodukt*;;                                |
|              |                | National Institute for Health and Care Excellence   |
|              |                | National Institute for Health and Care Excellence;; |
|              |                | NCB                                                 |
|              |                | NCB;;                                               |
|              |                | near patient testing                                |
|              |                | near patient testing;;                              |
|              |                | Nebenwirkung*                                       |
|              |                | Nebenwirkung*;;                                     |
|              |                | neoteben                                            |
|              |                | neoteben;;                                          |
|              |                | nephrotic syndrome                                  |
|              |                | neue* Medikament*                                   |
|              |                | neue* Medikament*;;                                 |
|              |                | neurodegenerati*                                    |
|              |                | neurodegenerati*;;                                  |
|              |                | Neuromuscular disease                               |
|              |                | new medicine*                                       |
|              |                | new medicine*;;                                     |

| Roche Brands | Roche Products | Medical and Biological terms            |
|--------------|----------------|-----------------------------------------|
|              |                | next generation sequencing              |
|              |                | NGOs                                    |
|              |                | NGOs;;                                  |
|              |                | NGS                                     |
|              |                | NICE                                    |
|              |                | NICE;;                                  |
|              |                | nichtstaatliche Organisationen          |
|              |                | nichtstaatliche Organisationen;;        |
|              |                | NimbleGen;;                             |
|              |                | nipt                                    |
|              |                | non small cell lung cancer              |
|              |                | Non-comparable biotherapeutic product   |
|              |                | Non-comparable biotherapeutic product;; |
|              |                | Non-Hodgkin-Lymphom                     |
|              |                | Non-Hodgkin-Lymphom;;                   |
|              |                | non-Hodgkin's lymphom*                  |
|              |                | non-invasive prenatal test              |
|              |                | NT-proBNP;;                             |
|              |                | nydrazid                                |
|              |                | nydrazid;;                              |
|              |                | obesit*                                 |
|              |                | obesit*;;                               |
|              |                | obesity                                 |
|              |                | obesity;;                               |
|              |                | Obstructive ling disease                |
|              |                | occult blood testing                    |
|              |                | occult blood testing;;                  |
|              |                | ocular hypertension                     |
|              |                | Oncology                                |
|              |                | Oncology;;                              |
|              |                | onkologi*                               |
|              |                | onkologi*;;                             |
|              |                | Onkologie                               |
|              |                | Onkologie;;                             |
|              |                | open heart surgery                      |
|              |                | organtransplantation*                   |
|              |                | organtransplantation*;;                 |
|              |                | Osteoporosys                            |
|              |                | osteopor*                               |
|              |                | osteopor*;;                             |

| Roche Brands | Roche Products | Medical and Biological terms |
|--------------|----------------|------------------------------|
|              |                | osteoporose                  |
|              |                | osteoporose;;                |
|              |                | ostheopor*                   |
|              |                | ostheopor*;;                 |
|              |                | OTC-Produkt*                 |
|              |                | OTC-Produkt*;;               |
|              |                | ovarian cancer               |
|              |                | oxfam                        |
|              |                | oxfam;;                      |
|              |                | oxygen transport             |
|              |                | Panceatitis                  |
|              |                | pancreatic cancer            |
|              |                | pandemi*                     |
|              |                | pandemi*;;                   |
|              |                | parallel import              |
|              |                | parallel import;;            |
|              |                | parallel imports             |
|              |                | parallel imports;;           |
|              |                | Parallelimport               |
|              |                | Parallelimport;;             |
|              |                | Parallelimporte              |
|              |                | Parallelimporte;;            |
|              |                | Parkinson*                   |
|              |                | Parkinson*;;                 |
|              |                | patent filing*               |
|              |                | patent filing*;;             |
|              |                | patent lawsuit*              |
|              |                | patent lawsuit*;;            |
|              |                | patent protection            |
|              |                | patent protection;;          |
|              |                | patent ruling*               |
|              |                | Patentablauf*                |
|              |                | Patentablauf*;;              |
|              |                | Patentantr*                  |
|              |                | Patentantr*;;                |
|              |                | Patententscheid*             |
|              |                | Patententscheid*;;           |
|              |                | Patentschutz                 |
|              |                | Patentschutz;;               |
|              |                | Patentstreit*                |
|              |                | Patentstreit*;;              |
|              |                | Pathology                    |

| Roche Brands | Roche Products | Medical and Biological terms |
|--------------|----------------|------------------------------|
|              |                | Pathway;;                    |
|              |                | patient                      |
|              |                | patient advocacy group       |
|              |                | patient advocacy group;;     |
|              |                | patient advocacy groups      |
|              |                | patient advocacy groups;;    |
|              |                | patient organisation         |
|              |                | patient organisation;;       |
|              |                | patient organisations        |
|              |                | patient organisations;;      |
|              |                | patient;;                    |
|              |                | Patienten*                   |
|              |                | Patienten*;;                 |
|              |                | Patientenorganisation*       |
|              |                | Patientenorganisation*;;     |
|              |                | patients                     |
|              |                | patients;;                   |
|              |                | PCR                          |
|              |                | PCR;;                        |
|              |                | peptid*                      |
|              |                | peptid*;;                    |
|              |                | personalisierte Medizin      |
|              |                | personalisierte Medizin;;    |
|              |                | PF-05280014                  |
|              |                | PF-05280014;;                |
|              |                | PF-05280586                  |
|              |                | PF-05280586;;                |
|              |                | PF-06439535                  |
|              |                | PF-06439535;;                |
|              |                | PHARMA                       |
|              |                | pharma access                |
|              |                | pharma access;;              |
|              |                | pharma compan*               |
|              |                | pharma compan*;;             |
|              |                | pharma giant                 |
|              |                | pharma giant;;               |
|              |                | Pharma keywords;;            |
|              |                | pharma sector                |
|              |                | pharma sector;;              |
|              |                | Pharma*                      |
|              |                | Pharma*;;                    |
|              |                | pharmaaccess                 |

| Roche Brands | Roche Products | Medical and Biological terms            |
|--------------|----------------|-----------------------------------------|
|              |                | pharmaaccess;;                          |
|              |                | Pharmacogenomic                         |
|              |                | Pharmacogenomic;;                       |
|              |                | Pharmaverband                           |
|              |                | Pharmaverband;;                         |
|              |                | PhRMA                                   |
|              |                | PhRMA;;                                 |
|              |                | pipeline                                |
|              |                | pipeline;;                              |
|              |                | Plasmascreening                         |
|              |                | Plasmascreening;;                       |
|              |                | Plasmatest                              |
|              |                | Plasmatest;;                            |
|              |                | Point of Care                           |
|              |                | Point testing                           |
|              |                | Point testing;;                         |
|              |                | Polydipsia                              |
|              |                | polymerase chain reaction               |
|              |                | polymerase chain reaction;;             |
|              |                | Potassium depletion                     |
|              |                | Prediction                              |
|              |                | Predisposition                          |
|              |                | Preeclampsia                            |
|              |                | pregnancy care                          |
|              |                | Preiskontrolle                          |
|              |                | Preiskontrolle;;                        |
|              |                | Preisreduktion                          |
|              |                | Preisreduktion;;                        |
|              |                | Preisregulierung                        |
|              |                | Preisregulierung;;                      |
|              |                | Preissenkung*                           |
|              |                | Preissenkung*;;                         |
|              |                | prescription drug costs                 |
|              |                | prescription drug costs;;               |
|              |                | Prevention                              |
|              |                | price control                           |
|              |                | price control;;                         |
|              |                | Primary Staining                        |
|              |                | Producto bioterapeutico no comparable   |
|              |                | Producto bioterapeutico no comparable;; |



| Roche Brands | Roche Products | Medical and Biological terms           |
|--------------|----------------|----------------------------------------|
|              |                | produits biologiques non-comparables   |
|              |                | produits biologiques non-comparables;; |
|              |                | produits biologiques successeurs       |
|              |                | produits biologiques successeurs;;     |
|              |                | Prostate cancer                        |
|              |                | protein*                               |
|              |                | protein*;;                             |
|              |                | Proteomics                             |
|              |                | Proteomics;;                           |
|              |                | Psoriasis                              |
|              |                | Psoriasis;;                            |
|              |                | pulmonary disease                      |
|              |                | Pulmonary embolisme                    |
|              |                | Pulmonary fibrosis                     |
|              |                | Pulmonary Oedema                       |
|              |                | r&d                                    |
|              |                | r&d;;                                  |
|              |                | Reagents                               |
|              |                | Recherche et développement             |
|              |                | Recherche et développement;;           |
|              |                | Reference labs                         |
|              |                | Reflotron;;                            |
|              |                | reimbursement                          |
|              |                | reimbursement;;                        |
|              |                | Renal                                  |
|              |                | renal cell cancer                      |
|              |                | Renal failure                          |
|              |                | Renal tubular acidosis                 |
|              |                | research                               |
|              |                | Research & development                 |
|              |                | Research & development;;               |
|              |                | research department*                   |
|              |                | research department*;;                 |
|              |                | research lab*                          |
|              |                | research lab*;;                        |
|              |                | research laborator*                    |
|              |                | research laborator*;;                  |
|              |                | research process                       |
|              |                | research process;;                     |

| Roche Brands | Roche Products | Medical and Biological terms |
|--------------|----------------|------------------------------|
|              |                | research;;                   |
|              |                | Respiratory Acidosis         |
|              |                | Respiratory Alkalosis        |
|              |                | Respiratory depression       |
|              |                | rezeptfrei*                  |
|              |                | rezeptfrei*;;                |
|              |                | rezeptpflichtig*             |
|              |                | rezeptpflichtig*;;           |
|              |                | RG7800                       |
|              |                | RG7800;;                     |
|              |                | rheumatoid arthritis         |
|              |                | rheumatoide arthritis        |
|              |                | rheumatoide arthritis;;      |
|              |                | rimifon                      |
|              |                | rimifon;;                    |
|              |                | risk prediction              |
|              |                | risk prediction;;            |
|              |                | RNA                          |
|              |                | RNA;;                        |
|              |                | rückerstattung               |
|              |                | rückerstattung;;             |
|              |                | Rückruf eines Medikamentes   |
|              |                | Rückruf eines Medikamentes;; |
|              |                | Rx-drugs                     |
|              |                | Rx-drugs;;                   |
|              |                | Salt-losing neuropathies     |
|              |                | santesuisse                  |
|              |                | santesuisse;;                |
|              |                | SB3                          |
|              |                | SB3;;                        |
|              |                | schizophreni*                |
|              |                | schizophreni*;;              |
|              |                | schizophrenia*               |
|              |                | schizophrenia*;;             |
|              |                | Schizophrenie                |
|              |                | Schizophrenie;;              |
|              |                | SCIENCE                      |
|              |                | Science keywords;;           |
|              |                | scientif*                    |
|              |                | scientif*;;                  |
|              |                | Screening                    |
|              |                | Screening programs           |

| Roche Brands | Roche Products | Medical and Biological terms                  |
|--------------|----------------|-----------------------------------------------|
|              |                | Selbstdiagnose                                |
|              |                | Selbstdiagnose;;                              |
|              |                | Self monitoring                               |
|              |                | Sepsis                                        |
|              |                | Septic shock                                  |
|              |                | Septicemia                                    |
|              |                | Septifast;;                                   |
|              |                | Serology                                      |
|              |                | Serum Work Area                               |
|              |                | Severe hemorrhage                             |
|              |                | Severe hyperlipidemia                         |
|              |                | Shunt of venous blood to arterial system      |
|              |                | skin cancer                                   |
|              |                | SMA                                           |
|              |                | SMA;;                                         |
|              |                | spanish keywords" copia de producto biologico |
|              |                | Special Stains                                |
|              |                | Specimen workflow                             |
|              |                | spinal muscular atrophy                       |
|              |                | spinal muscular atrophy;;                     |
|              |                | stammzell*                                    |
|              |                | stammzell*;;                                  |
|              |                | standardized blood test or diabetes           |
|              |                | Stechhilfe                                    |
|              |                | Stechhilfe;;                                  |
|              |                | stem cell*                                    |
|              |                | stem cell*;;                                  |
|              |                | stoffwechselkrank*                            |
|              |                | stoffwechselkrank*;;                          |
|              |                | stoffwechselkrankheit*                        |
|              |                | stoffwechselkrankheit*;;                      |
|              |                | Stratification                                |
|              |                | Stress                                        |
|              |                | Stroke                                        |
|              |                | studie                                        |
|              |                | studie;;                                      |
|              |                | study                                         |
|              |                | study;;                                       |
|              |                | Swisslab;;                                    |

| Roche Brands | Roche Products | Medical and Biological terms |
|--------------|----------------|------------------------------|
|              |                | Swissmedic                   |
|              |                | Swissmedic;;                 |
|              |                | Syphilis                     |
|              |                | Sysmex;;                     |
|              |                | TaqScreen;;                  |
|              |                | TDM                          |
|              |                | therap*                      |
|              |                | therap*;;                    |
|              |                | Therapie*                    |
|              |                | Therapie*;;                  |
|              |                | Therapiegebiet*;;            |
|              |                | Therapy                      |
|              |                | Therapy;;                    |
|              |                | tierexperim*                 |
|              |                | tierexperim*;;               |
|              |                | tierversuch*                 |
|              |                | tierversuch*;;               |
|              |                | Tina-quant;;                 |
|              |                | Tissue Diagnostics           |
|              |                | Tissue Diagnostics;;         |
|              |                | Tissue oxygenation           |
|              |                | Tissue perfusion             |
|              |                | TORCH                        |
|              |                | Transplantationsmedizin      |
|              |                | transplantationsmedizin*     |
|              |                | transplantationsmedizin*;;   |
|              |                | Transplantationsmedizin;;    |
|              |                | TRIPS                        |
|              |                | TRIPS;;                      |
|              |                | Troptonin;;                  |
|              |                | tuber?ulos*                  |
|              |                | tuber?ulos*;;                |
|              |                | tumor                        |
|              |                | Tumor markers                |
|              |                | Tumor*                       |
|              |                | Tumor*;;                     |
|              |                | tumormarkers                 |
|              |                | unaids                       |
|              |                | unaids;;                     |
|              |                | Urine                        |
|              |                | Urisys;;                     |
|              |                | urogenital*                  |

| Roche Brands | Roche Products | Medical and Biological terms |
|--------------|----------------|------------------------------|
|              |                | urogenital*;;                |
|              |                | Urogenitalerkrankung*        |
|              |                | Urogenitalerkrankung*;;      |
|              |                | V1 receptor antagonist       |
|              |                | V1 receptor antagonist;;     |
|              |                | Value of diagnostics         |
|              |                | vasculitis                   |
|              |                | Vasoconstriction             |
|              |                | Venous thromboembolism       |
|              |                | Venous tromboembolism        |
|              |                | virenstam*                   |
|              |                | virenstam*;;                 |
|              |                | Virenstamm                   |
|              |                | Virenstamm;;                 |
|              |                | virologi*                    |
|              |                | virologi*;;                  |
|              |                | Virologie                    |
|              |                | Virologie;;                  |
|              |                | virology                     |
|              |                | virology;;                   |
|              |                | Virus                        |
|              |                | Virus;;                      |
|              |                | Vitamin D defect             |
|              |                | Vitamin D deficiency         |
|              |                | Vogelgrippe                  |
|              |                | Vogelgrippe;;                |
|              |                | Water balance                |
|              |                | West Nile Virus              |
|              |                | West Nile Virus;;            |
|              |                | WHO;;                        |
|              |                | Wirkstoff*                   |
|              |                | Wirkstoff*;;                 |
|              |                | wissenschaft*                |
|              |                | wissenschaft*;;              |
|              |                | Women's Health               |
|              |                | Workflow consulting          |
|              |                | world trade organisation     |
|              |                | world trade organisation;;   |
|              |                | ZNS                          |
|              |                | ZNS;;                        |
|              |                | Zulassungsanmeldung*         |
|              |                | Zulassungsanmeldung*;;       |

| Roche Brands | Roche Products | Medical and Biological terms                         |
|--------------|----------------|------------------------------------------------------|
|              |                | Zulassungsbehörde*                                   |
|              |                | Zulassungsbehörde*;;                                 |
|              |                | Zulassungsverfahren*                                 |
|              |                | Zulassungsverfahren*;;                               |
|              |                | "Thema Patente: englische Begriffe" patent ruling*;; |
|              |                | *genom*                                              |
|              |                | *genom*;;                                            |
|              |                | *grippe*                                             |
|              |                | *grippe*;;                                           |
|              |                | *hodgkin lymphom*                                    |
|              |                | *hodgkin lymphom*;;                                  |
|              |                | *infektion*                                          |
|              |                | *infektion*;;                                        |
|              |                | *krankheit*                                          |
|              |                | *krankheit*;;                                        |
|              |                | *krebs*                                              |
|              |                | *krebs*;;                                            |
|              |                | *nervensystem*                                       |
|              |                | *nervensystem*;;                                     |
|              |                | *therapie*                                           |
|              |                | *therapie*;;                                         |
|              |                | *tumor*                                              |
|              |                | *tumor*;;                                            |
|              |                | *wirkstoff*                                          |
|              |                | *wirkstoff*;;                                        |
