# Supplementary material for: Sorting Through the Safety Data Haystack: Using Machine Learning to Identify Individual Case Safety Reports in Social-Digital Media
Source: PubMed Central journal article supplement — Drug Saf. 2018 Feb 14;41(6):579–90. doi: 10.1007/s40264-018-0641-7 (PMC5966485; doi:10.1007/s40264-018-0641-7), 2018-02-14
Supplement: 40264_2018_641_MOESM3_ESM.pdf [file 40264_2018_641_MOESM3_ESM.pdf]

## Sorting through the Safety Data Haystack: Using Machine Learning to Identify Individual Case Safety Reports (ICSRs) in Social-Digital Media

### *Drug Safety*

Shaun Comfort, Sujan Perera, Zoe Hudson, Darren Dorrell, Shawman Meireis, Meenakshi Nagarajan, Cartic Ramakrishnan and Jennifer Fine

Corresponding Author:  
 Shaun Comfort, MD  
 Genentech - A Member of the Roche Group  
 South San Francisco, CA 94080  
[comforts@gene.com](mailto:comforts@gene.com)

### Electronic Supplementary Material 3 Machine Learning and Pharmacovigilance statistical methods

**Team 2x2 Summary Comparison Table**  
 (AKA “Confusion Matrix”, “Classification Matrix”, etc.)\*,\*\*

|                          | Reference System (RS) Results |                 |                 |                 |
|--------------------------|-------------------------------|-----------------|-----------------|-----------------|
| Test System (TS) Results |                               | Pos             | Neg             | Totals          |
|                          | Pos                           | A: tp           | B: fp           | G: Total TS Pos |
|                          | Neg                           | C: fn           | D: tn           | H: Total TS Neg |
| Totals                   | E: Total RS Pos               | F: Total RS Neg | I: Total Events |                 |

\* Cell values can be raw counts or percentage of total counts;

\*\* Note that tp, tn, etc may or may not reflect “true” positive or negative classifications depending on whether the reference standard is considered a “gold” standard or “ground truth”. When the RS is a true “Gold” standard it is customary to use tp, tn, etc. When the RS is a “non-Gold” standard or a non-reference standard, it is customary to use the cell letters for calculations instead.

#### **Cell Definitions:**

- A** = true positive (tp)
- B** = false positive (fp)
- C** = false negative (fn)
- D** = true negative (tn)
- E** = **A** + **C** (or tp + fn)
- F** = **B** + **D** (or fp + tn)
- G** = **A** + **B** (or tp + fp)
- H** = **C** + **D** (or fn + tn)

**I** = Total Events = **A** + **B** + **C** + **D** (or  $tp + fp + fn + tn$ )

### Team Classification Performance Formulas

| Classification Formulas                                                                                                | Comment(s)                                                               |
|------------------------------------------------------------------------------------------------------------------------|--------------------------------------------------------------------------|
| Sensitivity ( $S_n$ ) = $\frac{tp}{tp+fn}$                                                                             | Equivalent to Positive Percent Agreement and Recall (Rc)                 |
| Specificity ( $S_p$ ) = $\frac{tn}{tn+fp}$                                                                             | Equivalent to Negative Percent Agreement                                 |
| Accuracy (Acc) = $\frac{tp+tn}{tp+fp+tn+fn}$                                                                           | Equivalent to Overall Percent Agreement and Prob(Observed Agreement)     |
| Error Rate (Err) = $\frac{fp+fn}{tp+fp+tn+fn}$                                                                         | Equivalent to Overall % Negative Agreement and Prob(Negative Agreement)  |
| Positive Predictive Value (PPV) = $\frac{tp}{tp+fp}$                                                                   | Equivalent to Precision (Pc)                                             |
| Negative Predictive Value (NPV) = $\frac{tn}{tn+fn}$                                                                   |                                                                          |
| $e(\pi) = \left\{ \frac{(2tp+fn+fp)/2}{tp+fp+tn+fn} \right\}^2 + \left\{ \frac{(2tn+fp+fn)/2}{tp+fp+tn+fn} \right\}^2$ | Expected chance agreement for Gwet AC1                                   |
| Gwet ACI ( $k_g$ ) = $\frac{Acc-e(\pi)}{1-e(\pi)}$                                                                     | Chance adjusted Inter-Rater Gwet "Kappa" agreement between the TS and RS |
| F-Measure ( $F_m$ ) = $\frac{2*Pc*Rc}{Pc+Rc}$                                                                          | The harmonic mean between recall (Rc) and precision (Pc) values          |
