# Supplementary material for: Sorting Through the Safety Data Haystack: Using Machine Learning to Identify Individual Case Safety Reports in Social-Digital Media
Source: PubMed Central journal article supplement — Drug Saf. 2018 Feb 14;41(6):579–90. doi: 10.1007/s40264-018-0641-7 (PMC5966485; doi:10.1007/s40264-018-0641-7), 2018-02-14
Supplement: 40264_2018_641_MOESM4_ESM.pdf [file 40264_2018_641_MOESM4_ESM.pdf]

**Sorting through the Safety Data Haystack: Using Machine Learning to Identify Individual Case Safety Reports (ICSRs) in Social-Digital Media**

*Drug Safety*

Shaun Comfort, Sujan Perera, Zoe Hudson, Darren Dorrell, Shawman Meireis, Meenakshi Nagarajan, Cartic Ramakrishnan and Jennifer Fine

Corresponding Author:

Shaun Comfort, MD

Genentech - A Member of the Roche Group

South San Francisco, CA 94080

[comforts@gene.com](mailto:comforts@gene.com)

**Electronic Supplementary Material 4** Full Analysis of Classifier Performance Metrics

*Please refer to Electronic Supplementary Material 3 for the equations for calculating all performance metrics*

**Analysis of Iteration I Classifier Performance (Figure 3b)**

| Human Subject Matter Expert (SME) vs Automated Classifier (AC) Classification Counts |     |     |     |        | SME vs AC Classification % |       |       |        |
|--------------------------------------------------------------------------------------|-----|-----|-----|--------|----------------------------|-------|-------|--------|
| ICSR (YES/NO)?                                                                       |     | SME |     |        | SME                        |       |       |        |
|                                                                                      |     | Yes | No  | Totals |                            | Yes   | No    |        |
| AC                                                                                   | Yes | 10  | 29  | 39     | Yes                        | 6.6%  | 19.1% | 25.7%  |
|                                                                                      | No  | 23  | 90  | 113    | No                         | 15.1% | 59.2% | 74.3%  |
| Totals                                                                               |     | 33  | 119 | 152    |                            | 21.7% | 78.3% | 100.0% |

  

|                             |       |
|-----------------------------|-------|
| Sensitivity =               | 30.3% |
| Specificity =               | 75.6% |
| Accuracy =                  | 65.8% |
| Error Rate =                | 34.2% |
| Positive Predictive Value = | 25.6% |
| Negative Predictive Value = | 79.6% |
| Prob_AC1(Expected) =        | 36.1% |
| Gwet AC1 Score =            | 46.4% |
| F-Score (Fs) =              | 27.8% |

**Analysis of Iteration II Classifier Performance (Figure 3c)**

| Human Subject Matter Expert (SME) vs Automated Classifier (AC) Classification Counts |     |     |     |        | SME vs AC Classification % |       |       |        |
|--------------------------------------------------------------------------------------|-----|-----|-----|--------|----------------------------|-------|-------|--------|
| ICSR (YES/NO)?                                                                       |     | SME |     |        | SME                        |       |       |        |
|                                                                                      |     | Yes | No  | Totals |                            | Yes   | No    |        |
| AC                                                                                   | Yes | 16  | 22  | 38     | Yes                        | 10.5% | 14.5% | 25.0%  |
|                                                                                      | No  | 17  | 97  | 114    | No                         | 11.2% | 63.8% | 75.0%  |
| Totals                                                                               |     | 33  | 119 | 152    |                            | 21.7% | 78.3% | 100.0% |

  

|                             |       |
|-----------------------------|-------|
| Sensitivity =               | 48.5% |
| Specificity =               | 81.5% |
| Accuracy =                  | 74.3% |
| Error Rate =                | 25.7% |
| Positive Predictive Value = | 42.1% |
| Negative Predictive Value = | 85.1% |
| Prob_AC1(Expected) =        | 35.8% |
| Gwet AC1 Score =            | 60.0% |
| F-Score (Fs) =              | 45.1% |

**Analysis of Iteration III Classifier Performance (Figure 5a)**

| Human Subject Matter Expert (SME) vs Automated Classifier (AC) Classification Counts |     |     |      |        | SME vs AC Classification % |      |       |        |
|--------------------------------------------------------------------------------------|-----|-----|------|--------|----------------------------|------|-------|--------|
| ICSR (YES/NO)?                                                                       |     | SME |      |        | SME                        |      |       |        |
|                                                                                      |     | Yes | No   | Totals |                            | Yes  | No    |        |
| AC                                                                                   | Yes | 58  | 229  | 287    | Yes                        | 4.3% | 16.9% | 21.1%  |
|                                                                                      | No  | 5   | 1066 | 1071   | No                         | 0.4% | 78.5% | 78.9%  |
| Totals                                                                               |     | 63  | 1295 | 1358   |                            | 4.6% | 95.4% | 100.0% |

  

|                             |       |
|-----------------------------|-------|
| Sensitivity =               | 92.1% |
| Specificity =               | 82.3% |
| Accuracy =                  | 82.8% |
| Error Rate =                | 17.2% |
| Positive Predictive Value = | 20.2% |
| Negative Predictive Value = | 99.5% |
| Prob_AC1(Expected) =        | 22.5% |
| Gwet AC1 Score =            | 77.8% |
| F-Score (Fs) =              | 33.1% |
